# Supplementary material for: Upper-lower body super-sets vs. traditional sets for inducing chronic athletic performance improvements
Source: PeerJ. 2023 Feb 21;11:e14636. doi: 10.7717/peerj.14636 (PMC9951798; doi:10.7717/peerj.14636)
Supplement: Supplemental Information 1 [file peerj-11-14636-s001.xlsx]

## Sheet: antropometric data
Group	Age	Height (cm)	Body mass (kg)	1RM SQ	1RM BP	# loads SQ	# loads PB
Tradicional
Alternas	26	174.5	71.3	68	63	4	4
Tradicional	21	179	72.6	100	64	7	5
Tradicional	19	165.2	72.3	82	62	5	4
Alternas	20	160.4	58.5	76	73	5	5
Alternas	24	171	82	130	75	9	5
Tradicional	27	180.4	73.4	104	93	7	7
Tradicional	31	160.9	57.3	81	84	5	6
Alternas	22	169.5	69.8	138	100	10	7
Alternas	21	168.4	69.5	106	87	7	6
Alternas	24	178.5	73	94	61	6	4
Tradicional	30	182	80.7	75	64	5	4
Alternas	21	180	76	67	71	4	5
Tradicional	22	176	94.5	93	80	6	6
Alternas	18	188	79.2	106	60	8	4
Alternas	21	184	89	92	68	6	5
Alternas	39	161	67.6	95	69	6	5
Tradicional	23	176	66.8	95	54	6	4
Tradicional	22	162	60.4	82	67	5	5
AVERAGE:	23.9444	173.156	72.9944	93.5556	71.9444	6.16667	5.05556
SD:	5.13892	8.69498	9.74761	19.1072	12.4072	1.61791	0.998365

## Sheet: CMJ results
subject	group	pre CMJ (cm)	post CMJ (cm)	%
4	TS	41.07	44.83	9.1551
5		40.43	43.4	7.34603
9		45.4	42.7	-5.94714
10		37.8	37.767	-0.0873016
1		28.67	29.9	4.2902
3		28.63	30.6	6.88089
8		35.27	36.37	3.1188
9		42.57	43.3	1.71482
Global group		37.48	38.6084	3.01061
	SD:	6.2238	5.92946	4.84007
1	AS	28.9333	34.0666	17.7417
15		47.13	49.23	4.45576
17		43.17	44.73	3.61362
19		33.47	32.63	-2.50971
6		34.2	36.9	7.89474
7		45.4	43.6	-3.96476
2		30.9	33.1	7.11974
5		39.47	39.43	-0.101343
6		33.87	35.53	4.90109
7		37.2	38.63	3.84409
Global group		37.3743	38.7847	3.77352
	SD:	6.22151	5.52449	6.11617

## Sheet: SQ results
Subject	Group	pre-SQ 1RM	post-SQ 1RM	%	pre-SQ AV (m·s−1)	post-SQ AV (m·s−1)	%	pre AV≥1 (m·s−1)	post AV≥1 (m·s−1)	%	pre AV<1 (m·s−1)	post AV<1 (m·s−1)	%	pre-Fatige SQ AV (m·s−1)	post-Fatige SQ AV (m·s−1)	%
4	TS	100	107	7	1.0129	1.0943	8.03633	1.225	1.3225	7.95918	0.73	0.79	8.21918	0.8783	0.9075	3.3246
5		82	90	9.7561	0.844	0.97	14.9289	1.02	1.14	11.7647	0.8	0.9325	16.5625	0.92	1.004	9.13043
9		104	103	-0.961538	0.9757	0.9843	0.881418	1.145	1.15	0.436681	0.75	0.815	8.66667	0.9492	0.9458	-0.358196
10		81	86	6.17284	0.904	1.004	11.0619	1.13	1.215	7.52212	0.7533	0.8633	14.6024	0.9225	0.9825	6.50407
1		75	80	6.66667	0.866	0.868	0.230947	1.075	1.065	-0.930233	0.727	0.737	1.37552	0.9167	0.8408	-8.2797
3		93	110	18.2796	0.92833	1.14667	23.5197	1.175	1.35	14.8936	0.805	1.045	29.8137	0.91833	1.02833	11.9783
8		95	104	9.47368	1.0167	1.0983	8.02597	1.1867	1.2766	7.57563	0.8467	0.92	8.65714	0.8775	0.9383	6.92877
9		82	87	6.09756	0.932	0.948	1.71674	1.13	1.13	0	0.8	0.8267	3.3375	0.915	0.85167	-6.92131
Promedio grupo		89	95.875	7.72472	0.934954	1.0142	8.47555	1.13584	1.20614	6.18927	0.7765	0.866187	11.5502	0.912191	0.937363	2.75943
	SD:	10.3923	11.357	5.35434	0.0637588	0.0923856	7.98513	0.0647438	0.101786	5.80343	0.0425907	0.0970631	8.99663	0.0237694	0.0680172	7.39299
1	AS	68	73	7.35294	0.875	0.97	10.8571	1.09	1.24	13.7615	0.8033	0.88	9.54811	0.8875	0.9533	7.41408
15		138	139	0.724638	1.108	1.119	0.99278	1.32	1.3333	1.00758	0.79	0.7975	0.949367	0.8892	0.8483	-4.59964
17		106	108	1.88679	0.9286	1.1386	22.6147	1.1033	1.3866	25.6775	0.7975	0.9525	19.4357	0.9083	1.0958	20.643
19				#DIV/0!			#DIV/0!			#DIV/0!			#DIV/0!			#DIV/0!
6		76	93	22.3684	0.83	1.068	28.6747	1.06	1.29	21.6981	0.7725	1.0125	31.068	0.8667	1.17	34.9948
7		130	147	13.0769	1.0722	1.2133	13.1599	1.268	1.396	10.0946	0.8275	0.98	18.429	0.84167	0.97167	15.4455
2		67	82	22.3881	0.885	1.06	19.774	1.06	1.22	15.0943	0.8267	1.006	21.6886	0.8808	1.055	19.7775
5		106	110	3.77358	1.0413	1.0013	-3.84135	1.3275	1.255	-5.46139	0.755	0.7475	-0.993377	0.8808	0.8008	-9.08265
6		92	85	-7.6087	0.94167	0.92167	-2.12389	1.15	1.19	3.47826	0.8375	0.7875	-5.97015	0.8375	0.81	-3.28358
7				#DIV/0!			#DIV/0!			#DIV/0!			#DIV/0!			#DIV/0!
Mean:		97.875	104.625	6.89655	0.960221	1.06148	10.5457	1.17235	1.28886	9.93837	0.80125	0.895438	11.7551	0.874059	0.963109	10.1881
	SD:	27.0789	26.8591	10.6332	0.101541	0.0955339	#DIV/0!	0.114838	0.0765852	#DIV/0!	0.0286887	0.106704	#DIV/0!	0.0242399	0.137317	#DIV/0!

## Sheet: BP results
Subjet	Group	pre-PB 1RM	post-BP 1RM	%	pre-BP AV (m·s−1)	post-BP AV (m·s−1)	%	pre AV≥0.8 (m·s−1)	post AV≥0.8 (m·s−1)	%	pre AV<0.8 (m·s−1)	post AV<0.8 (m·s−1)	%	pre-Fatigue BP AV (m·s−1)	post-Fatigue BP AV (m·s−1)	%
4	SC	64	66	3.125	0.7444	0.804	8.00645	1.085	1.17	7.8341	0.5167	0.56	8.3801	0.5767	0.6733	16.7505
5		62	74	19.3548	0.7975	0.915	14.7335	1.05	1.115	6.19048	0.545	0.715	31.1927	0.6908	0.7267	5.19687
9		93	94	1.07527	0.79429	0.82429	3.77696	1.11	1.1433	3	0.5575	0.585	4.93274	0.6883	0.6958	1.08964
10		84	87	3.57143	0.755	0.9017	19.4305	0.99	1.19	20.202	0.52	0.6133	17.9423	0.7367	0.88	19.4516
1		64	65	1.5625	0.825	0.8475	2.72727	1.045	1.075	2.87081	0.605	0.62	2.47934	0.60167	0.62083	3.18447
3		80	90	12.5	0.81667	0.89833	9.99914	1.1033	1.1533	4.53186	0.53	0.6433	21.3774	0.65333	0.7125	9.05668
8		54	58	7.40741	0.705	0.7725	9.57447	0.975	1.045	7.17949	0.435	0.5	14.9425	0.6325	0.6092	-3.68379
9		67	74	10.4478	0.768	0.802	4.42708	1.095	1.085	-0.913242	0.55	0.6133	11.5091	0.65	0.69273	6.57385
Promedio grupo		71	76	7.04225	0.775733	0.845665	9.01503	1.05666	1.12207	6.19048	0.5324	0.606237	13.8688	0.65375	0.701382	7.28604
	SD:	13.1909	13.0603	6.38331	0.0403481	0.053688	5.75035	0.0515278	0.0505927	6.25849	0.0481991	0.062527	9.40441	0.0514947	0.0832807	7.75595
1	SA	63	61	-3.1746	0.77	0.7675	-0.324675	0.98	0.995	1.53061	0.56	0.54	-3.57143	0.634167	0.6175	-2.62817
15		100	102	2	0.86	0.92286	7.3093	1.1633	1.2433	6.87699	0.6325	0.6825	7.90514	0.6125	0.6767	10.4816
17		87	91	4.5977	0.8917	0.9033	1.30089	1.17	1.1767	0.57265	0.6133	0.63	2.72297	0.6117	0.5958	-2.59931
19		61	63	3.27869	0.7625	0.75	-1.63934	0.975	0.94	-3.58974	0.55	0.56	1.81818	0.6667	0.6383	-4.25979
6		73	77	5.47945	0.738	0.854	15.7182	1.02	1.14	11.7647	0.55	0.6633	20.6	0.6942	0.78	12.3596
7		75	78	4	0.794	0.91	14.6096	1.085	1.24	14.2857	0.6	0.69	15	0.63333	0.72583	14.6053
2		71	72	1.40845	0.762	0.806	5.77428	1.065	1.125	5.6338	0.56	0.59333	5.95179	0.6925	0.6892	-0.476534
5		60	66	10	0.785	0.8625	9.87261	1.05	1.105	5.2381	0.52	0.62	19.2308	0.59167	0.69583	17.6044
6		68	72	5.88235	0.73	0.826	13.1507	1.015	1.0367	2.13793	0.54	0.6133	13.5741	0.643333	0.794545	23.5045
7		69	74	7.24638	0.766	0.822	7.3107	1.095	1.12	2.28311	0.5467	0.6233	14.0113	0.6475	0.71	9.65251
Mean:		72.7	75.6	3.989	0.78592	0.842416	7.18852	1.06183	1.11217	4.74087	0.56725	0.621573	9.57655	0.64276	0.692371	7.71836
	SD:	12.4101	12.6245	3.57907	0.0515727	0.0591127	6.15998	0.0682824	0.0987807	5.33224	0.0358212	0.0489029	7.99673	0.0339434	0.0646972	9.72573
