# Supplementary material for: Upper-lower body super-sets vs. traditional sets for inducing chronic athletic performance improvements
Source: PeerJ. 2023 Feb 21;11:e14636. doi: 10.7717/peerj.14636 (PMC9951798; doi:10.7717/peerj.14636)
Supplement: Supplemental Information 2 [file peerj-11-14636-s002.xlsx]

## Sheet: SQ MPVbest
	SQUAT
SUBJECT	GROUP	SESSION 1	SESSION 2	SESSION 3	SESSION 4	SESSION 5	SESSION 6	SESSION 7	SESSION 8	SESSION 9	SESSION 10	SESSION 11	SESSION 12
1	B	1.08	1.06	1.1	0.99	0.98	1.02	0.94	0.94	0.89	0.86	0.82	0.84
4	A	1.08	1.06	1.11	1.01	0.99	1	0.94	0.93	0.89	0.83	0.81	0.83
5	A	1.05	1.06	1.07	1	0.99	0.97	0.95	0.88	0.93	0.82	0.81	0.83
6	B	1.07	1.08	1.03	1.02	1.01	0.98	0.95	0.94	0.88	0.86	0.85	0.86
7	B	1.08	1.12	1.1	1.04	1.03	1.04	0.92	0.93	0.92	0.83	0.84	0.86
9	A	1.09	1.05	1.07	1.02	0.98	1.02	0.94	0.91	0.9	0.85	0.84	0.86
10	A	1.05	1.11	1.11	1	1.02	0.98	0.94	0.94	0.92	0.84	0.83	0.82
15	B	1.07	1.07	1.08	0.98	0.98	0.97	0.91	0.91	0.91	0.85	0.83	0.84
17	B	1.08	1.07	1.1	1.01	0.99	1.03	0.91	0.92	0.93	0.85	0.85	0.83
19	B	1.05	1.04	1.05	1.01	1.01	1.03	0.93	0.92	0.96	0.84	0.84	0.84
1	A	1.06	1.1	1.06	1	1.02	1.03	0.91	0.91	0.9	0.85	0.81	0.88
2	B	1.11	1.09	1.09	1	1.05	0.98	0.89	0.91	0.9	0.82	0.84	0.83
3	A	1.13	1.09	1.08	1.04	1	1	0.89	0.9	0.94	0.84	0.85	0.84
5	B	1.07	1.04	1.05	0.97	0.98	1.02	0.93	0.94	0.91	0.85	0.83	0.81
6	B	1.09	1.08	1.09	0.99	1	0.99	0.89	0.92	0.92	0.87	0.81	0.83
7	B	1.05	1.09	1.06	1.03	0.97	1.02	0.93	0.94	0.92	0.81	0.87	0.86
8	A	1.07	1.09	1.05	1.02	1.03	0.97	0.94	0.9	0.89	0.84	0.83	0.85
9	A	1.08	1.05	1.11	1.03	1.03	1.03	0.89	0.93	0.91	0.81	0.84	0.82
TRADITIONAL	GROUP A	1.07625	1.07625	1.0825	1.015	1.0075	1	0.925	0.9125	0.91	0.835	0.8275	0.84125
(TS)	SD	0.026152	0.0238672	0.0243487	0.0151186	0.0198206	0.0250713	0.0244949	0.0198206	0.0185164	0.0141421	0.0158114	0.0210017	0.0206805
ALTERNATING	GROUP B	1.075	1.074	1.075	1.004	1	1.008	0.92	0.927	0.914	0.844	0.838	0.84
(AS)	SD	0.0177951	0.0241293	0.0254951	0.0222111	0.0253859	0.0252982	0.02	0.0125167	0.0222111	0.0189737	0.0168655	0.0163299	0.020601

## Sheet: BP MPVbest
	BENCH PRESS
SUBJECT	GROUP	SESSION 1	SESSION 2	SESSION 3	SESSION 4	SESSION 5	SESSION 6	SESSION 7	SESSION 8	SESSION 9	SESSION 10	SESSION 11	SESSION 12
1	B	0.86	0.87	0.86	0.79	0.77	0.76	0.69	0.67	0.71	0.61	0.59	0.61
4	A	0.85	0.86	0.88	0.77	0.8	0.76	0.7	0.71	0.69	0.64	0.61	0.62
5	A	0.89	0.9	0.85	0.81	0.78	0.82	0.69	0.68	0.7	0.66	0.63	0.59
6	B	0.85	0.88	0.86	0.75	0.71	0.82	0.73	0.69	0.65	0.6	0.63	0.63
7	B	0.85	0.92	0.86	0.77	0.81	0.8	0.71	0.74	0.72	0.62	0.62	0.58
9	A	0.87	0.84	0.87	0.81	0.81	0.77	0.71	0.7	0.74	0.62	0.63	0.61
10	A	0.88	0.88	0.89	0.81	0.8	0.78	0.69	0.71	0.7	0.61	0.6	0.64
15	B	0.88	0.9	0.87	0.77	0.76	0.8	0.7	0.71	0.73	0.61	0.61	0.62
17	B	0.87	0.88	0.82	0.78	0.81	0.78	0.7	0.67	0.68	0.61	0.65	0.64
19	B	0.89	0.88	0.87	0.79	0.75	0.78	0.71	0.69	0.7	0.65	0.6	0.64
1	A	0.89	0.9	0.89	0.79	0.8	0.82	0.69	0.69	0.67	0.59	0.65	0.63
2	B	0.87	0.87	0.88	0.81	0.77	0.79	0.72	0.69	0.71	0.6	0.61	0.62
3	A	0.87	0.85	0.85	0.79	0.76	0.77	0.68	0.68	0.67	0.59	0.6	0.62
5	B	0.88	0.86	0.85	0.76	0.76	0.75	0.73	0.73	0.71	0.6	0.63	0.59
6	B	0.86	0.87	0.87	0.78	0.79	0.77	0.73	0.73	0.73	0.65	0.65	0.63
7	B	0.85	0.85	0.85	0.75	0.75	0.77	0.69	0.71	0.68	0.64	0.6	0.62
8	A	0.87	0.87	0.86	0.78	0.75	0.75	0.67	0.69	0.69	0.59	0.6	0.62
9	A	0.88	0.87	0.85	0.77	0.77	0.75	0.68	0.69	0.67	0.61	0.61	0.6
TRADITIONAL	GROUP A	0.875	0.87125	0.8675	0.79125	0.78375	0.7775	0.68875	0.69375	0.69125	0.61375	0.61625	0.61625
(TS)	SD	0.0130931	0.0216712	0.0175255	0.0172689	0.0219984	0.0281577	0.0124642	0.0118773	0.023566	0.0255999	0.0184681	0.0159799	0.0189725
ALTERNATING	GROUP B	0.866	0.878	0.859	0.775	0.768	0.782	0.711	0.703	0.702	0.619	0.619	0.618
(AS)	SD	0.0142984	0.0198886	0.0166333	0.0190029	0.0301109	0.0209762	0.0159513	0.0249666	0.0252982	0.0202485	0.02079	0.0198886	0.0206711

## Sheet: SQ %1RM
	SQUAT
SUBJECT	GROUP	SESSION 1	SESSION 2	SESSION 3	SESSION 4	SESSION 5	SESSION 6	SESSION 7	SESSION 8	SESSION 9	SESSION 10	SESSION 11	SESSION 12
1	B	0.55	0.56	0.54	0.61	0.62	0.59	0.64	0.64	0.67	0.69	0.71	0.7
4	A	0.55	0.57	0.53	0.59	0.61	0.6	0.64	0.65	0.67	0.71	0.72	0.71
5	A	0.57	0.56	0.56	0.61	0.61	0.62	0.63	0.67	0.65	0.71	0.72	0.71
6	B	0.56	0.55	0.58	0.59	0.6	0.61	0.63	0.64	0.68	0.69	0.7	0.69
7	B	0.55	0.53	0.54	0.58	0.58	0.58	0.65	0.64	0.65	0.71	0.7	0.69
9	A	0.55	0.57	0.56	0.59	0.61	0.59	0.64	0.66	0.67	0.69	0.7	0.69
10	A	0.57	0.53	0.54	0.6	0.59	0.62	0.64	0.64	0.65	0.7	0.71	0.71
15	B	0.55	0.56	0.55	0.62	0.62	0.62	0.66	0.66	0.66	0.7	0.71	0.7
17	B	0.55	0.56	0.54	0.6	0.61	0.58	0.66	0.65	0.64	0.69	0.7	0.71
19	B	0.53	0.58	0.57	0.6	0.61	0.59	0.65	0.66	0.63	0.7	0.7	0.7
1	A	0.56	0.54	0.57	0.61	0.59	0.58	0.66	0.66	0.67	0.69	0.72	0.68
2	B	0.54	0.55	0.55	0.6	0.57	0.61	0.67	0.66	0.67	0.71	0.7	0.71
3	A	0.52	0.54	0.55	0.58	0.6	0.6	0.67	0.66	0.64	0.7	0.7	0.7
5	B	0.56	0.58	0.57	0.62	0.62	0.59	0.64	0.64	0.66	0.7	0.71	0.72
6	B	0.54	0.55	0.54	0.61	0.6	0.61	0.67	0.65	0.66	0.68	0.72	0.71
7	B	0.57	0.55	0.57	0.58	0.62	0.59	0.64	0.64	0.65	0.72	0.68	0.69
8	A	0.56	0.54	0.57	0.59	0.58	0.62	0.64	0.66	0.67	0.7	0.71	0.7
9	A	0.55	0.57	0.54	0.59	0.58	0.59	0.67	0.65	0.66	0.72	0.7	0.71
TRADITIONAL	%1RM	0.55375	0.5525	0.5525	0.595	0.59625	0.6025	0.64875	0.65625	0.66	0.7025	0.71	0.70125	0.627604
Group A	VMP 1ª	1.08	1.075	1.08	1.015	1.01	1	0.925	0.91	0.91	0.84	0.825	0.84	0.959167
	SD													0.0964797
ALTERNATING	%1RM	0.55	0.557	0.555	0.601	0.605	0.597	0.651	0.648	0.657	0.699	0.703	0.702	0.627083
Group B	VMP 1ª	1.075	1.07	1.075	1	1	1.01	0.92	0.93	0.91	0.84	0.84	0.84	0.959167
	SD													0.0916722

## Sheet: BP%1RM
	BENCH PRESS
SUBJECT	GROUP	SESSION 1	SESSION 2	SESSION 3	SESSION 4	SESSION 5	SESSION 6	SESSION 7	SESSION 8	SESSION 9	SESSION 10	SESSION 11	SESSION 12
1	B	0.56	0.55	0.55	0.6	0.61	0.61	0.66	0.67	0.65	0.71	0.72	0.71
4	A	0.56	0.55	0.54	0.61	0.59	0.61	0.65	0.65	0.65	0.69	0.7	0.7
5	A	0.54	0.53	0.56	0.59	0.6	0.58	0.66	0.66	0.65	0.68	0.69	0.72
6	B	0.56	0.54	0.55	0.62	0.61	0.58	0.63	0.65	0.68	0.71	0.69	0.7
7	B	0.56	0.52	0.55	0.61	0.59	0.59	0.64	0.63	0.63	0.7	0.7	0.72
9	A	0.55	0.56	0.55	0.58	0.58	0.6	0.64	0.65	0.63	0.7	0.69	0.71
10	A	0.54	0.54	0.54	0.58	0.59	0.6	0.66	0.64	0.65	0.7	0.71	0.69
15	B	0.54	0.53	0.55	0.6	0.61	0.59	0.65	0.65	0.63	0.71	0.71	0.7
17	B	0.55	0.54	0.58	0.6	0.59	0.6	0.65	0.67	0.66	0.71	0.68	0.69
19	B	0.53	0.53	0.55	0.59	0.62	0.6	0.65	0.66	0.65	0.68	0.71	0.69
1	A	0.53	0.53	0.54	0.59	0.59	0.58	0.66	0.65	0.67	0.72	0.68	0.69
2	B	0.55	0.55	0.54	0.58	0.61	0.59	0.64	0.65	0.64	0.71	0.71	0.7
3	A	0.54	0.56	0.56	0.59	0.61	0.61	0.67	0.66	0.67	0.72	0.72	0.7
5	B	0.54	0.55	0.56	0.62	0.62	0.62	0.63	0.63	0.65	0.71	0.69	0.72
6	B	0.55	0.55	0.55	0.6	0.61	0.61	0.63	0.63	0.63	0.68	0.68	0.69
7	B	0.56	0.56	0.56	0.62	0.62	0.61	0.65	0.65	0.67	0.69	0.72	0.7
8	A	0.55	0.55	0.55	0.6	0.62	0.62	0.67	0.66	0.65	0.72	0.71	0.7
9	A	0.54	0.55	0.56	0.61	0.61	0.62	0.66	0.66	0.67	0.71	0.71	0.71
TRADITIONAL	%1RM	0.54375	0.54625	0.55	0.59375	0.59875	0.6025	0.65875	0.65375	0.655	0.705	0.70125	0.7025	0.625938
Group A	VMP 1ª	0.875	0.87	0.865	0.79	0.78	0.775	0.69	0.69	0.69	0.61	0.62	0.62	0.739583
	SD													0.099669
ALTERNATING	%1RM	0.55	0.542	0.554	0.604	0.609	0.6	0.643	0.649	0.649	0.701	0.701	0.702	0.625333
Group B	VMP 1ª	0.87	0.875	0.86	0.78	0.77	0.78	0.71	0.7	0.7	0.62	0.62	0.62	0.742083
	SD													0.0957615

## Sheet: %VL SQ
	SQUAT
SUBJECT	GROUP	SESSION 1	SESSION 2	SESSION 3	SESSION 4	SESSION 5	SESSION 6	SESSION 7	SESSION 8	SESSION 9	SESSION 10	SESSION 11	SESSION 12
1	B	0.178	0.173	0.194	0.187	0.164	0.169	0.152	0.154	0.154	0.142	0.136	0.169
4	A	0.168	0.182	0.166	0.167	0.218	0.193	0.147	0.198	0.143	0.223	0.175	0.172
5	A	0.199	0.172	0.145	0.184	0.203	0.17	0.183	0.2	0.169	0.188	0.133	0.144
6	B	0.243	0.254	0.181	0.167	0.189	0.196	0.162	0.154	0.153	0.151	0.186	0.161
7	B	0.198	0.191	0.192	0.233	0.185	0.194	0.214	0.141	0.148	0.156	0.155	0.179
9	A	0.165	0.149	0.172	0.174	0.163	0.151	0.155	0.163	0.165	0.15	0.174	0.158
10	A	0.161	0.151	0.153	0.193	0.152	0.162	0.159	0.135	0.158	0.133	0.156	0.159
15	B	0.178	0.162	0.167	0.162	0.165	0.198	0.183	0.189	0.163	0.16	0.17	0.169
17	B	0.192	0.193	0.178	0.185	0.179	0.186	0.186	0.19	0.162	0.165	0.178	0.17
19	B	0.195	0.236	0.162	0.191	0.179	0.211	0.171	0.166	0.178	0.155	0.184	0.152
1	A	0.225	0.217	0.171	0.192	0.179	0.168	0.177	0.14	0.163	0.191	0.16	0.162
2	B	0.21	0.17	0.194	0.163	0.192	0.163	0.144	0.171	0.136	0.167	0.146	0.145
3	A	0.203	0.2006	0.178	0.181	0.191	0.215	0.175	0.187	0.169	0.161	0.177	0.183
5	B	0.167	0.192	0.178	0.168	0.173	0.143	0.199	0.158	0.157	0.145	0.157	0.145
6	B	0.168	0.177	0.173	0.169	0.179	0.159	0.154	0.185	0.146	0.177	0.146	0.164
7	B	0.202	0.173	0.165	0.171	0.235	0.145	0.149	0.161	0.152	0.177	0.167	0.173
8	A	0.213	0.161	0.178	0.197	0.156	0.159	0.159	0.159	0.153	0.151	0.155	0.155
9	A	0.193	0.192	0.183	0.19	0.162	0.163	0.142	0.175	0.163	0.143	0.154	0.165
TRADITIONAL	GROUP A	0.190875	0.178075	0.16825	0.18475	0.178	0.172625	0.162125	0.169625	0.160375	0.1675	0.1605	0.16225	0.171246
(TS)	SD	0.0237754	0.0243155	0.0131339	0.010306	0.0240119	0.021037	0.0147691	0.0247614	0.00883075	0.030388	0.0147067	0.0116343	0.0184725
ALTERNATING	GROUP B	0.1931	0.1921	0.1784	0.1796	0.184	0.1764	0.1714	0.1669	0.1549	0.1595	0.1625	0.1627	0.173458
(AS)	SD	0.0227325	0.0300239	0.0119555	0.0214227	0.0201329	0.0237777	0.0234388	0.0166163	0.0113083	0.0121129	0.0172063	0.0117856	0.0185428

## Sheet: %VL BP
	BENCH PRESS
SUBJECT	GROUP	SESSION 1	SESSION 2	SESSION 3	SESSION 4	SESSION 5	SESSION 6	SESSION 7	SESSION 8	SESSION 9	SESSION 10	SESSION 11	SESSION 12
1	B	0.213	0.242	0.21	0.246	0.225	0.232	0.271	0.222	0.2	0.213	0.205	0.186
4	A	0.261	0.207	0.229	0.216	0.244	0.2	0.207	0.215	0.215	0.203	0.245	0.2
5	A	0.218	0.216	0.267	0.244	0.236	0.24	0.258	0.246	0.188	0.222	0.206	0.195
6	B	0.218	0.22	0.215	0.23	0.259	0.258	0.192	0.215	0.206	0.208	0.184	0.207
7	B	0.221	0.21	0.227	0.232	0.246	0.24	0.235	0.204	0.228	0.206	0.205	0.202
9	A	0.211	0.216	0.221	0.231	0.224	0.243	0.206	0.195	0.221	0.204	0.191	0.175
10	A	0.221	0.223	0.225	0.216	0.205	0.21	0.2	0.193	0.215	0.202	0.221	0.204
15	B	0.216	0.218	0.168	0.204	0.245	0.241	0.234	0.209	0.183	0.199	0.181	0.187
17	B	0.239	0.234	0.261	0.237	0.236	0.211	0.233	0.204	0.181	0.235	0.19	0.211
19	B	0.23	0.222	0.242	0.266	0.229	0.242	0.246	0.196	0.197	0.229	0.236	0.209
1	A	0.215	0.222	0.239	0.22	0.221	0.23	0.218	0.193	0.196	0.202	0.201	0.222
2	B	0.205	0.227	0.223	0.215	0.213	0.198	0.2	0.211	0.221	0.194	0.207	0.212
3	A	0.185	0.233	0.228	0.223	0.188	0.195	0.213	0.212	0.203	0.207	0.216	0.228
5	B	0.222	0.223	0.243	0.214	0.226	0.215	0.205	0.232	0.235	0.189	0.254	0.245
6	B	0.225	0.249	0.214	0.194	0.219	0.223	0.21	0.21	0.21	0.214	0.194	0.185
7	B	0.193	0.217	0.212	0.215	0.22	0.208	0.212	0.214	0.185	0.231	0.217	0.205
8	A	0.234	0.221	0.226	0.272	0.2	0.221	0.194	0.232	0.2	0.178	0.191	0.249
9	A	0.228	0.233	0.217	0.229	0.256	0.208	0.232	0.185	0.196	0.208	0.232	0.216
TRADITIONAL	GROUP A	0.221625	0.221375	0.2315	0.231375	0.22175	0.218375	0.216	0.208875	0.20425	0.20325	0.212875	0.211125	0.216865
(TS)	SD	0.0215668	0.0087658	0.0157117	0.0188523	0.0232056	0.0180391	0.0205426	0.0214705	0.0115357	0.0121273	0.0193423	0.0226806	0.01782
ALTERNATING	GROUP B	0.2182	0.2262	0.2215	0.2253	0.2318	0.2268	0.2238	0.2117	0.2046	0.2118	0.2073	0.2049	0.217825
(AS)	SD	0.0128305	0.012072	0.0250743	0.0212449	0.0144438	0.0188373	0.024257	0.010056	0.0190275	0.0158381	0.0231423	0.0176349	0.0178715

## Sheet: Reps SQ
	SQUAT
SUBJECT	GROUP	SESSION 1	SESSION 2	SESSION 3	SESSION 4	SESSION 5	SESSION 6	SESSION 7	SESSION 8	SESSION 9	SESSION 10	SESSION 11	SESSION 12	Total reps
1	B	10.33	11.66	10.66	13.33	10.66	14.33	8	8.33	6.66	5.33	6.33	6	111.62
4	A	6.33	5.33	6.66	5.33	6.33	5.66	5	6	5.33	4	3.33	3.33	62.63
5	A	8.33	12.33	12	12	7	7.66	7	5.66	4.33	5.33	4.66	4.66	90.96
6	B	5.66	5.33	9.33	7	7.33	6.66	5.66	6.33	7.66	5.66	4.33	5.33	76.28
7	B	5.66	8.33	5.66	5.66	5	4.66	5.33	5	4	3.33	2.66	2.66	57.95
9	A	14.66	14.33	12.66	11.33	14	15	10	10	8.66	6.66	8.33	5.33	130.96
10	A	11	11.66	12	7.66	11	13.66	11	8.33	12.66	7.66	8.33	5.66	120.62
15	B	7	7.66	6.33	6	5.33	6	4.33	5.33	4.33	4.33	3.66	4.33	64.63
17	B	9.66	10.33	7.33	6	6.66	4.33	2.66	4	2.33	2.33	2.33	2.66	60.62
19	B	7	10	10	8.66	7.33	6	6	5.66	5.66	3.66	3.66	3.33	76.96
1	A	12	11.7	10	9	7.66	8.66	7	7.66	6.33	4.33	5.66	5.66	95.66
2	B	8.33	6.66	9	7.66	8	6.33	5.66	6	6.66	4.66	5.33	4.33	78.62
3	A	8.66	6.66	10.33	6.66	4.33	4	4.33	4	3.33	5	5.33	3	65.63
5	B	9.33	7.66	7	8	5	6.33	5	3.33	4.33	3.33	4.33	3.66	67.3
6	B	7	8.33	6.66	5.66	6.33	5.33	5.66	6	5.66	5.33	4	5.66	71.62
7	B	13	11.33	7.66	5.66	6.33	6	5.33	5	7	5	3.33	4.3	79.94
8	A	10	9	9.66	7.66	5.66	5.33	5.66	5	4.66	3.33	4	4	73.96
9	A	18.33	15.33	13.66	12.66	9.66	7.66	6.33	5.33	4.66	4.33	6.33	6	110.28
TRADITIONAL	GROUP A	11.1638	10.7925	10.8712	9.0375	8.205	8.45375	7.04	6.4975	6.245	5.08	5.74625	4.705	93.8375
(TS)	SD	3.84194	3.52891	2.19671	2.68192	3.16833	3.9399	2.34096	1.99173	3.04766	1.44299	1.84935	1.1457	2.29045
ALTERNATING	GROUP B	8.297	8.729	7.963	7.363	6.797	6.597	5.363	5.498	5.429	4.296	3.996	4.226	74.554
(AS)	SD	2.31256	2.05406	1.68178	2.36477	1.69979	2.81882	1.3388	1.36264	1.65477	1.09362	1.18697	1.17744	1.64961

## Sheet: Reps BP
	BENCH PRESS
SUBJECT	GROUP	SESSION 1	SESSION 2	SESSION 3	SESSION 4	SESSION 5	SESSION 6	SESSION 7	SESSION 8	SESSION 9	SESSION 10	SESSION 11	SESSION 12	Total reps
1	B	11	10	8	7.66	6.66	6.33	6.33	5.33	4.66	4.33	4.33	4.33	78.96
4	A	7.66	5.33	7.33	5.33	6	6.66	5	5	4.33	3	4	4	63.64
5	A	10.33	13.33	8.66	9.33	8.66	6	6.66	6.33	7	5	5.33	5.33	91.96
6	B	10.66	9.33	10	9.33	9	11.33	9	5.66	6.33	5.33	5.66	5.66	97.29
7	B	7	7.66	7.33	7.33	6	6.33	6.33	4.33	5.66	4	4	4	69.97
9	A	13.33	16.7	18.66	14	11.33	11.66	8.66	7.66	8	6.66	6	5.33	127.99
10	A	12	13.66	10	8.33	7.33	7	5.66	5.66	5.66	5.33	5	4	89.63
15	B	9.66	10	6.6	7	7	8.66	5.66	5.66	4.33	5	4.66	3.66	77.89
17	B	7.33	8	7	6	6	7	4	3.66	3.33	3.66	3.3	4	63.28
19	B	12	8.66	9	8	9	8.33	6.33	6.7	6.66	3.66	4	3.66	86
1	A	7	8.66	8	5	5.33	5.33	4.33	3.66	4	3.33	3.33	3.66	61.63
2	B	12	11	10	8	6	7.66	5.33	5.66	7	5	5.33	4.66	87.64
3	A	7.66	9	8.66	8.3	6	5.66	4.66	4.3	5.3	4	3	4	70.54
5	B	7.33	8	7.33	6	7	6	5	4.66	6	3.66	3.66	3.66	68.3
6	B	7.66	8	7.33	7.33	6	7	6	4.66	5	4.33	3.66	3.33	70.3
7	B	9.66	10	11	8.66	8.3	9.3	6.66	7	7	5	5.3	5.66	93.54
8	A	9	7.66	7.3	5.66	5.66	4.66	4	4.66	4.33	3.33	2.66	3.33	62.25
9	A	9.3	9.66	8.66	7.7	6.7	6	5.66	5.66	5.66	3.66	4.66	4.33	77.65
TRADITIONAL	GROUP A	9.535	10.5	9.65875	7.95625	7.12625	6.62125	5.57875	5.36625	5.535	4.28875	4.2475	4.2475	80.6612
(TS)	SD	2.23317	3.73344	3.73917	2.91907	2.00572	2.16279	1.50747	1.25606	1.39228	1.2644	1.19277	0.729104	2.24071
ALTERNATING	GROUP B	9.43	9.065	8.359	7.531	7.096	7.794	6.064	5.332	5.597	4.397	4.39	4.262	79.317
(AS)	SD	1.97628	1.15363	1.52818	1.05506	1.23439	1.65303	1.30324	1.03704	1.23601	0.646135	0.813716	0.827645	1.85426

## Sheet: ranges SQ (AS)
SUBJECT	SESSION	Set	<0.3	>0.3-0.4	>0.4-0.5	>0.5-0.6	>0.6-0.7	>0.7-0.8	>0.8-0.9	>0.9-1.0	>1.0-1.1	>1.1	total reps	Mean reps
1	1	1º							1	4	5		10	10.3333
		2ª							5	4	2		11
		3ª							3	7			10
	2	1º							1	6	4		11	11.6667
		2ª							1	10	3		14
		3ª							1	4	5		10
	3	1º							1	5	5	1	12	10.6667
		2ª								2	5		7
		3ª							1	8	4		13
	4	1º							10	10			20	13.3333
		2ª							5	5			10
		3ª						1	6	3			10
	5	1º							6	5			11	10.6667
		2ª						1	5	5			11
		3ª							6	4			10
	6	1º							5	7	1		13	14.3333
		2ª							2	6			8
		3ª							18	4			22
	7	1º							8	2			10	8
		2ª						2	5	1			8
		3ª						2	3	1			6
	8	1º							7	1			8	8.33333
		2ª						3	5				8
		3ª						5	4				9
	9	1º						2	5				7	6.66667
		2ª						4	3				7
		3ª						2	4				6
	10	1º						5	1				6	6.33333
		2ª						4	1				5
		3ª					2	5	1				8
	11	1º					1	3	2				6	5.66667
		2ª					1	4	1				6
		3ª					1	4					5
	12	1º					1	3	2				6	5.66667
		2ª					1	4	1				6
		3ª					1	4					5
	TOTAL		0	0	0	0	8	58	130	104	34	1	334
SUBJECT	SESSION	Set	<0.3	>0.3-0.4	>0.4-0.5	>0.5-0.6	>0.6-0.7	>0.7-0.8	>0.8-0.9	>0.9-1.0	>1.0-1.1	>1.1	total reps	Mean reps
6	1	1º						1	1	2	2		6	5.66667
		2ª						1	1	2	1		5
		3ª							2	3	1		6
	2	1º						1	1	2	2		6	5.33333
		2ª							3		2		5
		3ª							1	3	1		5
	3	1º								3	3		6	9.33333
		2ª							6	7	2		15
		3ª						1		5	1		7
	4	1º							2	6	1		9	7
		2ª							3	4			7
		3ª							3	1	1		5
	5	1º							2	4	1		7	7.33333
		2ª							2	2	1		5
		3ª							8	1	1		10
	6	1º						1	3	4			8	6.66667
		2ª						1	1	4			6
		3ª						2	4				6
	7	1º							4	1			5	5.66667
		2ª							4	1			5
		3ª						2	4	1			7
	8	1º						1	7	1			9	6.33333
		2ª						2	2	1			5
		3ª						1	4				5
	9	1º						3	6				9	7.66667
		2ª						4	3				7
		3ª						2	4	1			7
	10	1º						3	2				5	5.66667
		2ª						4	1				5
		3ª				2	4	1					7
	11	1º						4	1				5	4.33333
		2ª					1	2	1				4
		3ª					1	2	1				4
	12	1º						4	1				5	5.33333
		2ª					1	4	1				6
		3ª						4	1				5
	TOTAL		0	0	0	2	7	51	90	59	20	0	227
SUBJECT	SESSION	Set	<0.3	>0.3-0.4	>0.4-0.5	>0.5-0.6	>0.6-0.7	>0.7-0.8	>0.8-0.9	>0.9-1.0	>1.0-1.1	>1.1	total reps	Mean reps
7	1	1º								2	4		6	5.66667
		2ª							1	3	1		5
		3ª							1	3	2		6
	2	1º							1		2	4	7	8.33333
		2ª							1	9			10
		3ª							1	5	2		8
	3	1º							1	1	3		5	5.66667
		2ª							4	2			6
		3ª						1		4	1		6
	4	1º						1	2	1	1		5	5.66667
		2ª							1	4			5
		3ª					1		3	3			7
	5	1º								3	1		4	5
		2ª							2	3			5
		3ª						2	4				6
	6	1º							1	2	2		5	4.66667
		2ª						1	2	2			5
		3ª						1		3			4
	7	1º						2	3	1			6	5.33333
		2ª						1	4	1			6
		3ª						1	1	2			4
	8	1º						1	4	1			6	5
		2ª						1	2	2			5
		3ª							3	1			4
	9	1º						1	2	1			4	4
		2ª						2	2				4
		3ª						1	3				4
	10	1º						3	1				4	3.33333
		2ª					1	1	1				3
		3ª						2	1				3
	11	1º					1	1	1				3	2.66667
		2ª						1	2				3
		3ª					1	1					2
	12	1º						2	1				3	2.66667
		2ª					1	1	1				3
		3ª					1		1				2
	TOTAL		0	0	0	0	6	28	58	59	19	4	174
SUBJECT	SESSION	Set	<0.3	>0.3-0.4	>0.4-0.5	>0.5-0.6	>0.6-0.7	>0.7-0.8	>0.8-0.9	>0.9-1.0	>1.0-1.1	>1.1	total reps	Mean reps
15	1	1º							1	4	3		8	7
		2ª								3	2	2	7
		3ª							1	3	2		6
	2	1º								5	4		9	7.66667
		2ª							1	3	3		7
		3ª								4	3		7
	3	1º								4	3		7	6.33333
		2ª							1	3	3		7
		3ª								3	2		5
	4	1º							4	3			7	6
		2ª						1	2	2			5
		3ª						1	3	2			6
	5	1º							3	3			6	5.33333
		2ª							2	3			5
		3ª						1	2	2			5
	6	1º							4	4			8	6
		2ª						1	2	2			5
		3ª							3	1	1		5
	7	1º						2	2	1			5	4.33333
		2ª						1	3				4
		3ª						3	1				4
	8	1º						2	3	1			6	5.33333
		2ª						3	2				5
		3ª						2	3				5
	9	1º						1	2	1			4	4.33333
		2ª						1	3				4
		3ª						2	3				5
	10	1º						2	2				4	4.33333
		2ª					1	3	1				5
		3ª						4					4
	11	1º						2	1				3	3.66667
		2ª					1	2	1				4
		3ª					1	2	1				4
	12	1º						2	2				4	4.33333
		2ª					1	3					4
		3ª					1	3	1				5
	TOTAL		0	0	0	0	5	44	60	57	26	2	194
SUBJECT	SESSION	Set	<0.3	>0.3-0.4	>0.4-0.5	>0.5-0.6	>0.6-0.7	>0.7-0.8	>0.8-0.9	>0.9-1.0	>1.0-1.1	>1.1	total reps	Mean reps
17	1	1º								9	3		12	9.66667
		2ª							3	5	1		9
		3ª						2	3	3			8
	2	1º							1	6	5		12	10.3333
		2ª							2	1	2		5
		3ª							1	8	5		14
	3	1º								3	3		6	7.33333
		2ª							1	4	1		6
		3ª						2	7	1			10
	4	1º							1	5	1		7	6
		2ª						1	1	3			5
		3ª							1	5			6
	5	1º							2	6			8	6.66667
		2ª						1	3	4			8
		3ª						1	3				4
	6	1º							1	2	1		4	4.33333
		2ª						1	3	1			5
		3ª						1	2	1			4
	7	1º						2		1			3	2.66667
		2ª					1	1	1				3
		3ª					1	1					2
	8	1º						2	2	1			5	4
		2ª						1	1	2			4
		3ª						1	1	1			3
	9	1º						2		1			3	2.33333
		2ª						1	1				2
		3ª						1	1				2
	10	1º					1	1	1				3	2.33333
		2ª					1	1					2
		3ª					1	1					2
	11	1º						1	2				3	2.33333
		2ª					1	1					2
		3ª					1		1				2
	12	1º					1	1	1				3	2.66667
		2ª					2	1					3
		3ª					1	1					2
	TOTAL		0	0	0	0	11	29	47	73	22	0	182
SUBJECT	SESSION	Set	<0.3	>0.3-0.4	>0.4-0.5	>0.5-0.6	>0.6-0.7	>0.7-0.8	>0.8-0.9	>0.9-1.0	>1.0-1.1	>1.1	total reps	Mean reps
19	1	1º											0	0
		2ª											0
		3ª											0
	2	1º											0	0
		2ª											0
		3ª											0
	3	1º											0	0
		2ª											0
		3ª											0
	4	1º											0	0
		2ª											0
		3ª											0
	5	1º											0	0
		2ª											0
		3ª											0
	6	1º											0	0
		2ª											0
		3ª											0
	7	1º											0	0
		2ª											0
		3ª											0
	8	1º											0	0
		2ª											0
		3ª											0
	9	1º											0	0
		2ª											0
		3ª											0
	10	1º											0	0
		2ª											0
		3ª											0
	11	1º											0	0
		2ª											0
		3ª											0
	12	1º											0	0
		2ª											0
		3ª											0
	TOTAL		0	0	0	0	0	0	0	0	0	0	0
SUBJECT	SESSION	Set	<0.3	>0.3-0.4	>0.4-0.5	>0.5-0.6	>0.6-0.7	>0.7-0.8	>0.8-0.9	>0.9-1.0	>1.0-1.1	>1.1	total reps	Mean reps
2	1	1º								3	1	1	5	8.33333
		2ª						1	6	5			12
		3ª							5	2	1		8
	2	1º								3	5		8	6.66667
		2ª							3	3	1		7
		3ª							1	4			5
	3	1º							1	3	4		8	9
		2ª							4	5	1		10
		3ª							4	4	1		9
	4	1º							4	4	1		9	7.66667
		2ª						1	5	2			8
		3ª							3	3			6
	5	1º							1	5	2		8	8
		2ª						1	3	6			10
		3ª						2	2	2			6
	6	1º							1	7			8	6.33333
		2ª							3	3			6
		3ª							3	2			5
	7	1º						3	3				6	5.66667
		2ª						1	3				4
		3ª						4	3				7
	8	1º						1	2	1			4	6
		2ª						5	3				8
		3ª					1	3	2				6
	9	1º						2	7				9	6.66667
		2ª						2	3				5
		3ª					1	3	2				6
	10	1º						4	1				5	4.66667
		2ª					1	2	1				4
		3ª					1	4					5
	11	1º						5	1				6	5.33333
		2ª					1	3	1				5
		3ª					1	3	1				5
	12	1º						4	1				5	4.33333
		2ª						3	1				4
		3ª					2	2					4
	TOTAL		0	0	0	0	8	59	84	67	17	1	236
SUBJECT	SESSION	Set	<0.3	>0.3-0.4	>0.4-0.5	>0.5-0.6	>0.6-0.7	>0.7-0.8	>0.8-0.9	>0.9-1.0	>1.0-1.1	>1.1	total reps	Mean reps
5	1	1º							1	6	3		10	9.33333
		2ª							3	2	2		7
		3ª							5	6			11
	2	1º							1	3	3		7	7.66667
		2ª						1	3	5			9
		3ª						1	4	2			7
	3	1º							2	2	3		7	7
		2ª							2	5	1		8
		3ª							3	3			6
	4	1º							4	5			9	8
		2ª							3	3			6
		3ª					1	2	6				9
	5	1º						1	1	3			5	5
		2ª						1	2	2			5
		3ª						1	3	1			5
	6	1º							1	3	2		6	6.33333
		2ª							3	4			7
		3ª							2	4			6
	7	1º							1	4	1		6	5
		2ª					1	3	1				5
		3ª					1	3					4
	8	1º						1	2	1			4	3.33333
		2ª						1	2				3
		3ª						2	1				3
	9	1º						2	2	1			5	4.33333
		2ª						3	2				5
		3ª						2	1				3
	10	1º						3	1				4	3.33333
		2ª					1	2					3
		3ª					1	2					3
	11	1º					1	2	1				4	4.33333
		2ª					1	2	1				4
		3ª					1	4					5
	12	1º					1	2	1				4	3.66667
		2ª					3	1					4
		3ª					2	1					3
	TOTAL		0	0	0	0	14	43	65	65	15	0	202
SUBJECT	SESSION	Set	<0.3	>0.3-0.4	>0.4-0.5	>0.5-0.6	>0.6-0.7	>0.7-0.8	>0.8-0.9	>0.9-1.0	>1.0-1.1	>1.1	total reps	Mean reps
6	1	1º								3	4		7	7
		2ª							1	2	4		7
		3ª							1	3	3		7
	2	1º								4	5		9	8.33333
		2ª							1	2	4		7
		3ª							1	5	3		9
	3	1º								2	5		7	6.66667
		2ª							1	4	2		7
		3ª							1	3	2		6
	4	1º							3	2			5	5.66667
		2ª							3	3			6
		3ª						1	4	1			6
	5	1º							2	4			6	6.33333
		2ª							2	4			6
		3ª						1	3	3			7
	6	1º							3	3			6	5.33333
		2ª						1	3	2			6
		3ª						2	1	1			4
	7	1º						2	5				7	5.66667
		2ª						1	2	1			4
		3ª						4	2				6
	8	1º						1	6	1			8	6
		2ª						1	4				5
		3ª						2	3				5
	9	1º						1	4	1			6	5.66667
		2ª						3	2	2			7
		3ª						1	3				4
	10	1º					1	2	2				5	5.33333
		2ª						3	2				5
		3ª					1	4	1				6
	11	1º					1	2	1				4	4
		2ª					2	2					4
		3ª					2	2					4
	12	1º					1	4	1				6	5.66667
		2ª					3	3					6
		3ª					1	4					5
	TOTAL		0	0	0	0	12	47	68	56	32	0	215
SUBJECT	SESSION	Set	<0.3	>0.3-0.4	>0.4-0.5	>0.5-0.6	>0.6-0.7	>0.7-0.8	>0.8-0.9	>0.9-1.0	>1.0-1.1	>1.1	total reps	Mean reps
7	1	1º						1	6	7	8		22	13.3333
		2ª							1	4	4		9
		3ª						1	1	4	3		9
	2	1º							2	8	6		16	11.3333
		2ª								3	6		9
		3ª							1	4	4		9
	3	1º							1	5	3		9	7.66667
		2ª							1	2	3		6
		3ª							3	3	2		8
	4	1º							1	3	1		5	5.66667
		2ª							2	4	1		7
		3ª							2	2	1		5
	5	1º							3	4			7	6.33333
		2ª							2	3			5
		3ª							3	4			7
	6	1º							5	1			6	6
		2ª							1	4	1		6
		3ª							1	4	1		6
	7	1º						1	2	1			4	5.33333
		2ª						1	3	1			5
		3ª						2	4	1			7
	8	1º						1	2	2			5	5
		2ª						1	2	1			4
		3ª						1	4	1			6
	9	1º						4	4				8	7
		2ª						2	5				7
		3ª						2	4				6
	10	1º					1	4	2				7	5
		2ª						3	1				4
		3ª						3	1				4
	11	1º						3	1				4	3.33333
		2ª						2	1				3
		3ª						1	2				3
	12	1º						2	2				4	4.33333
		2ª						2	2				4
		3ª					1	2	2				5
	TOTAL		0	0	0	0	2	39	80	76	44	0	241
	MEAN TOTAL SQ (AS)		<0.3	>0.3-0.4	>0.4-0.5	>0.5-0.6	>0.6-0.7	>0.7-0.8	>0.8-0.9	>0.9-1.0	>1.0-1.1	>1.1	total reps
			0	0	0	0.222222	8.11111	44.2222	75.7778	68.4444	25.4444	0.888889	222.778
		SD	0	0	0	0.666667	3.72305	11.0993	24.4887	15.084	9.51461	1.36423	47.7723

## Sheet: ranges SQ (TS)
SUBJECT	SESSION	Set	<0.3	>0.3-0.4	>0.4-0.5	>0.5-0.6	>0.6-0.7	>0.7-0.8	>0.8-0.9	>0.9-1.0	>1.0-1.1	>1.1	total reps	Mean reps
4	1	1º								4	3		7	6.33333
		2ª							1	3	2		6
		3ª								2	3	1	6
	2	1º							1	2	3		6	5.33333
		2ª							1	1	1	1	4
		3ª							1	3	2		6
	3	1º								4	2	1	7	6.66667
		2ª								4	3		7
		3ª							1	3	2		6
	4	1º							2	2	1		5	5.33333
		2ª							1	4			5
		3ª							3	3			6
	5	1º							4	3			7	6.33333
		2ª					1	1	2	2			6
		3ª						1	4	1			6
	6	1º						1	1	3	1		6	5.66667
		2ª						1	2	2			5
		3ª							3	3			6
	7	1º							4	1			5	5
		2ª						4	2				6
		3ª						1	2	1			4
	8	1º						1	3	2			6	6
		2ª					1	2	3				6
		3ª					1	3	2				6
	9	1º						3	3				6	5.33333
		2ª						2	4				6
		3ª						2	2				4
	10	1º					1	2	2				5	4
		2ª				1	1	2					4
		3ª					1	1	1				3
	11	1º					1	2	1				4	3.33333
		2ª					1		2				3
		3ª					1	1	1				3
	12	1º					1	1	2				4	3.33333
		2ª					1	1	1				3
		3ª					1	1	1				3
	TOTAL		0	0	0	1	12	33	63	53	23	3	184
SUBJECT	SESSION	Set	<0.3	>0.3-0.4	>0.4-0.5	>0.5-0.6	>0.6-0.7	>0.7-0.8	>0.8-0.9	>0.9-1.0	>1.0-1.1	>1.1	total reps	Mean reps
5	1	1º							1	2	5		8	8.33333
		2ª							2	2	3		7
		3ª							1	6	3		10
	2	1º							1	1	2		4	12.3333
		2ª								5	7		12
		3ª								5	16		21
	3	1º								8	4		12	12
		2ª								9	3		12
		3ª							2	9	1		12
	4	1º							1	12			13	12
		2ª						1	3	7			11
		3ª							7	5			12
	5	1º							4	3			7	7
		2ª							2	3	1		6
		3ª						2	2	4			8
	6	1º							5	4			9	7.66667
		2ª							4	2			6
		3ª							3	5			8
	7	1º						1	2	1			4	7
		2ª						3	4	1			8
		3ª						1	3	5			9
	8	1º						2	2				4	5.66667
		2ª					1	6	1				8
		3ª					1	3	1				5
	9	1º					1	3	1				5	4.33333
		2ª					1		3				4
		3ª						3	1				4
	10	1º				1	1	4	1				7	5.33333
		2ª						4	1				5
		3ª						2	2				4
	11	1º					1	2	1				4	4.66667
		2ª					2	3					5
		3ª					3	2					5
	12	1º					1	2	2				5	4.66667
		2ª					2	2					4
		3ª					2	3					5
	TOTAL		0	0	0	1	16	49	63	99	45	0	272
SUBJECT	SESSION	Set	<0.3	>0.3-0.4	>0.4-0.5	>0.5-0.6	>0.6-0.7	>0.7-0.8	>0.8-0.9	>0.9-1.0	>1.0-1.1	>1.1	total reps	Mean reps
9	1	1º							1	4	8		13	14.6667
		2ª							1	9	7		17
		3ª							2	7	5		14
	2	1º							1	8	6		15	14.3333
		2ª								4	5		9
		3ª								10	9		19
	3	1º							1	10	6		17	12.6667
		2ª							1	10	3		14
		3ª							1	1	5		7
	4	1º							2	5	1		8	11.3333
		2ª							1	10	3		14
		3ª							3	8	1		12
	5	1º							4	13			17	17
		2ª							6	12	1		19
		3ª						1	6	8			15
	6	1º							1	15	1		17	15
		2ª								6	11		17
		3ª								5	6		11
	7	1º							9	2			11	10
		2ª						2	5	2			9
		3ª						2	7	1			10
	8	1º						1	10	2			13	10
		2ª						1	5	2			8
		3ª						1	6	2			9
	9	1º						3	8				11	8.66667
		2ª						1	4	1			6
		3ª						2	7				9
	10	1º						5	2				7	6.66667
		2ª						4	2				6
		3ª						5	2				7
	11	1º					1	3	5				9	8.33333
		2ª						3	5				8
		3ª						4	4				8
	12	1º						3	2				5	5.33333
		2ª					2	3	1				6
		3ª						4	1				5
	TOTAL		0	0	0	0	3	48	116	157	78	0	402
SUBJECT	SESSION	Set	<0.3	>0.3-0.4	>0.4-0.5	>0.5-0.6	>0.6-0.7	>0.7-0.8	>0.8-0.9	>0.9-1.0	>1.0-1.1	>1.1	total reps	Mean reps
10	1	1º							1	4	2		7	11
		2ª							8	7			15
		3ª							5	6			11
	2	1º								9	6		15	15.6667
		2ª								7	7		14
		3ª								15	3		18
	3	1º								9	6		15	15
		2ª								9	6		15
		3ª								12	3		15
	4	1º							6	6			12	11.3333
		2ª							7	5	1		13
		3ª							5	4			9
	5	1º							3	11	3		17	17
		2ª							4	10			14
		3ª							12	8			20
	6	1º							3	7			10	13.6667
		2ª							2	7	1		10
		3ª							11	10			21
	7	1º						1	10	3			14	17
		2ª						1	19	5			25
		3ª						1	7	4			12
	8	1º						1	3	4			8	8.33333
		2ª							5	2			7
		3ª						1	9				10
	9	1º						1	7	3			11	12.6667
		2ª						1	7	2			10
		3ª							14	3			17
	10	1º						3	4				7	7.66667
		2ª						5	2				7
		3ª						6	3				9
	11	1º					1	6	1				8	8.33333
		2ª						8	1				9
		3ª						7	1				8
	12	1º						5	2				7	5.66667
		2ª					1	4	1				6
		3ª					1	2	1				4
	TOTAL		0	0	0	0	3	53	164	172	38	0	430
SUBJECT	SESSION	Set	<0.3	>0.3-0.4	>0.4-0.5	>0.5-0.6	>0.6-0.7	>0.7-0.8	>0.8-0.9	>0.9-1.0	>1.0-1.1	>1.1	total reps	Mean reps
1	1	1º							2	8	4		14	12
		2ª							1	3	5		9
		3ª						1	2	8	2		13
	2	1º							1	5	5		11	11.6667
		2ª							6	4	1		11
		3ª							2	11			13
	3	1º							1	2	3		6	10
		2ª							3	8	2		13
		3ª							4	6	1		11
	4	1º							3	7			10	9
		2ª							3	2	2		7
		3ª							2	6	2		10
	5	1º							3	3	1		7	7.66667
		2ª							6	6			12
		3ª							3	1			4
	6	1º							5	2			7	8.66667
		2ª							2	8			10
		3ª						1	4	4			9
	7	1º						2	5	1			8	7
		2ª						2	6				8
		3ª						2	3				5
	8	1º						1	6	1			8	7.66667
		2ª						1	3	1			5
		3ª						5	5				10
	9	1º						1	5				6	6.33333
		2ª						4	1				5
		3ª					1	3	4				8
	10	1º					1	2	1				4	4.33333
		2ª					1	4					5
		3ª					1	3					4
	11	1º						3	2				5	5.66667
		2ª					2	2	1				5
		3ª					3	4					7
	12	1º						4	3				7	5.66667
		2ª					2	3					5
		3ª					2	3					5
	TOTAL		0	0	0	0	13	51	98	97	28	0	287
SUBJECT	SESSION	Set	<0.3	>0.3-0.4	>0.4-0.5	>0.5-0.6	>0.6-0.7	>0.7-0.8	>0.8-0.9	>0.9-1.0	>1.0-1.1	>1.1	total reps	Mean reps
3	1	1º								3	7	3	13	8.66667
		2ª								1	2	3	6
		3ª							1	1	3	2	7
	2	1º							1	3	3		7	6.66667
		2ª						1	2	2	3		8
		3ª								2	2	1	5
	3	1º								6	3	1	10	10.3333
		2ª								5	4	1	10
		3ª								2	7	2	11
	4	1º							2		2		4	6.66667
		2ª							4	5			9
		3ª							2	4	1		7
	5	1º							3	1			4	4.33333
		2ª					1		2	1			4
		3ª						2	2	1			5
	6	1º							3	1			4	4.33333
		2ª					1		2	1			4
		3ª						2	2	1			5
	7	1º					1	1	3				5	4.33333
		2ª						2	1				3
		3ª						2	3				5
	8	1º						2	1	1			4	4
		2ª						2	1	1			4
		3ª					1	2	1				4
	9	1º						1	3	1			5	3.33333
		2ª							2	1			3
		3ª						1	1				2
	10	1º						4	2				6	5
		2ª						2	2				4
		3ª						3	2				5
	11	1º						3	2				5	5.33333
		2ª					1	2	2				5
		3ª					1	4	1				6
	12	1º						2	1				3	3
		2ª						2	1				3
		3ª					1	1	1				3
	TOTAL		0	0	0	0	7	41	56	44	37	13	198
SUBJECT	SESSION	Set	<0.3	>0.3-0.4	>0.4-0.5	>0.5-0.6	>0.6-0.7	>0.7-0.8	>0.8-0.9	>0.9-1.0	>1.0-1.1	>1.1	total reps	Mean reps
8	1	1º								3	3		6	10
		2ª							1	5	4		10
		3ª							2	9	3		14
	2	1º							1	2	6		9	9
		2ª						1		6	2		9
		3ª							1	5	3		9
	3	1º							1	3	4		8	9.66667
		2ª							1	7	4		12
		3ª							1	5	3		9
	4	1º							2	3	2		7	7.66667
		2ª						1	3	4			8
		3ª						1	3	4			8
	5	1º							1	4	1		6	5.66667
		2ª							1	3	3		7
		3ª								1	3		4
	6	1º						2	2	1			5	5
		2ª						2	4				6
		3ª						2	2				4
	7	1º						1	2	2			5	5.66667
		2ª						1	3	2			6
		3ª							5	1			6
	8	1º							4	2			6	5
		2ª							3	2			5
		3ª							3	1			4
	9	1º					1	2	2				5	4.66667
		2ª						2	2				4
		3ª						4	1				5
	10	1º						2	2				4	3.33333
		2ª						2	1				3
		3ª					1	1	1				3
	11	1º					1	1	2				4	4
		2ª					1	3					4
		3ª						3	1				4
	12	1º						1	2				3	4
		2ª						2	2				4
		3ª						1	4				5
	TOTAL		0	0	0	0	4	35	66	75	41	0	221
SUBJECT	SESSION	Set	<0.3	>0.3-0.4	>0.4-0.5	>0.5-0.6	>0.6-0.7	>0.7-0.8	>0.8-0.9	>0.9-1.0	>1.0-1.1	>1.1	total reps	Mean reps
9	1	1º							1	6	5		12	18.3333
		2ª							2	14	9		25
		3ª							1	4	13		18
	2	1º							1	7	7		15	15.3333
		2ª							1	9	7		17
		3ª								3	11		14
	3	1º							1		6		7	13.6667
		2ª							6	6	4		16
		3ª								4	14		18
	4	1º							7	8	2		17	12.6667
		2ª							2	3	5		10
		3ª								6	5		11
	5	1º							2	6	1		9	9.66667
		2ª							2	8	1		11
		3ª							1	7	1		9
	6	1º							1	4	1		6	7.66667
		2ª							6	4			10
		3ª							4	2	1		7
	7	1º						1	5				6	6.33333
		2ª						1	2	1			4
		3ª						5	4				9
	8	1º						1	2	2			5	5.33333
		2ª							2	1			3
		3ª						3	5				8
	9	1º						2	3	1			6	4.66667
		2ª					1	1	2				4
		3ª						2	2				4
	10	1º					1	2	1				4	4.33333
		2ª					1	3	1				5
		3ª					1	3					4
	11	1º					1	3	2				6	6.33333
		2ª					1	6					7
		3ª					1	5					6
	12	1º					1	5	1				7	6
		2ª					1	5					6
		3ª					2	3					5
	TOTAL		0	0	0	0	11	51	70	106	93	0	331
SUBJECT	SESSION	Set	<0.3	>0.3-0.4	>0.4-0.5	>0.5-0.6	>0.6-0.7	>0.7-0.8	>0.8-0.9	>0.9-1.0	>1.0-1.1	>1.1	total reps	Mean reps
	1	1º											0	0
		2ª											0
		3ª											0
	2	1º											0	0
		2ª											0
		3ª											0
	3	1º											0	0
		2ª											0
		3ª											0
	4	1º											0	0
		2ª											0
		3ª											0
	5	1º											0	0
		2ª											0
		3ª											0
	6	1º											0	0
		2ª											0
		3ª											0
	7	1º											0	0
		2ª											0
		3ª											0
	8	1º											0	0
		2ª											0
		3ª											0
	9	1º											0	0
		2ª											0
		3ª											0
	10	1º											0	0
		2ª											0
		3ª											0
	11	1º											0	0
		2ª											0
		3ª											0
	12	1º											0	0
		2ª											0
		3ª											0
	TOTAL		0	0	0	0	0	0	0	0	0	0	0
SUBJECT	SESSION	Set	<0.3	>0.3-0.4	>0.4-0.5	>0.5-0.6	>0.6-0.7	>0.7-0.8	>0.8-0.9	>0.9-1.0	>1.0-1.1	>1.1	total reps	Mean reps
	1	1º											0	0
		2ª											0
		3ª											0
	2	1º											0	0
		2ª											0
		3ª											0
	3	1º											0	0
		2ª											0
		3ª											0
	4	1º											0	0
		2ª											0
		3ª											0
	5	1º											0	0
		2ª											0
		3ª											0
	6	1º											0	0
		2ª											0
		3ª											0
	7	1º											0	0
		2ª											0
		3ª											0
	8	1º											0	0
		2ª											0
		3ª											0
	9	1º											0	0
		2ª											0
		3ª											0
	10	1º											0	0
		2ª											0
		3ª											0
	11	1º											0	0
		2ª											0
		3ª											0
	12	1º											0	0
		2ª											0
		3ª											0
	TOTAL		0	0	0	0	0	0	0	0	0	0	0
	MEAN TOTAL SQ (TS)		<0.3	>0.3-0.4	>0.4-0.5	>0.5-0.6	>0.6-0.7	>0.7-0.8	>0.8-0.9	>0.9-1.0	>1.0-1.1	>1.1	total reps
			0	0	0	0.25	8.625	45.125	87	100.375	47.875	2	290.625
		SD	0	0	0	0.46291	5.0409	7.75403	37.2904	45.4311	24.579	4.56696	91.5079

[truncated: 2 more sheets: ranges BP (AS), ranges BP (TS)]
